# Supplementary material for: Porous gC3N4–Gd2Zr2O7 enables the high-temperature operation of Nafion membranes in polymer electrolyte fuel cells over 500 hours
Source: Royal Society of Chemistry journal article supplement (doi:10.1039/d2ta00483f), 2022-01-01
Supplement: d2ta00483f1.pdf [file d2ta00483f1.pdf]

**Electronic Supporting Information**

**Porous  $\text{gC}_3\text{N}_4\text{-Gd}_2\text{Zr}_2\text{O}_7$  enables the high-temperature operation of Nafion  
membrane in polymer electrolyte fuel cell over 500 hours**

Mohanraj Vinothkannan<sup>a</sup>, Byungrak Son<sup>b</sup>, and Sangaraju Shanmugam<sup>a,\*</sup>

<sup>a</sup> Department of Energy Science and Engineering,

Daegu Gyeongbuk Institute of Science & Technology (DGIST),

50-1, Sang-Ri, Hyeonpung-Myeon, Dalseong-Gun, Daegu 42988, The Republic of Korea.

<sup>b</sup> Division of Energy Technology, Daegu Gyeongbuk Institute of Science & Technology  
(DGIST), 50-1, Sang-Ri, Hyeonpung-Myeon, Dalseong-Gun, Daegu 42988, Republic of Korea

\*E-mail: [sangarajus@dgist.ac.kr](mailto:sangarajus@dgist.ac.kr)

## Measurements

### Water uptake and swelling degree

### Water uptake and swelling degree

The test protocols of changes in mass, length, width, and thickness of membranes after water uptake were as follows. The membranes were dried at 90 °C for 12 h in a vacuum oven. The mass ( $M_{dry}$ ), length ( $L_{dry}$ ), width ( $W_{dry}$ ), and thickness ( $T_{dry}$ ) of the dry membranes were recorded. Next, the membranes were drenched in DI water at 80 °C for 24 h to make them fully absorb water. The excess water on the membrane surfaces was wiped off quickly, and the mass ( $M_{wet}$ ), length ( $L_{wet}$ ), width ( $W_{wet}$ ), and thickness ( $T_{wet}$ ) were measured again.<sup>1, 2</sup> The water uptake, dimensional change, and thickness change were calculated by the following formulas, respectively.

$$\text{Water uptake (\%)} = \left[ \frac{M_{wet} - M_{dry}}{M_{dry}} \right] \times 100 \quad (S1)$$

$$\text{Dimensional change (\%)} = \left[ \frac{(W_{wet} \times L_{wet}) - (W_{dry} \times L_{dry})}{(W_{dry} \times L_{dry})} \right] \times 100 \quad (S2)$$

$$\text{Thickness change (\%)} = \left[ \frac{T_{wet} - T_{dry}}{T_{dry}} \right] \times 100 \quad (S3)$$

### Ion exchange capacity

To quantify the ion exchange capacity (IEC) values of the membranes, dry samples were engulfed into aqueous NaCl (3 M) for 24 h, followed by titration with a NaOH (0.01 M) with a phenolphthalein indicator.<sup>3</sup> The IEC was calculated from the following formula (4).

$$\text{IEC (meq. g}^{-1}\text{)} = \frac{\text{Volume of NaOH consumed} \times \text{Concentration of NaOH}}{\text{Weight of dry sample}} \quad (S4)$$

### Hydration number

The amount of water adsorbed per unit volume of the membrane was estimated by normalizing water uptake capacity with IEC values using the formula (5).<sup>4,5</sup>

$$\text{Hydration number } (\lambda) = \left[ \frac{\text{Water uptake}}{18.01} \right] \left[ \frac{10}{IEC} \right] \quad (S5)$$

where 18.01 is known as the molecular weight of water ( $\text{g mol}^{-1}$ ).

### Oxidative stability

Oxidative stability of the membranes was determined by recording the changes in weight of membranes after treatment in Fenton's reagent (3%  $\text{H}_2\text{O}_2$  containing 3 ppm  $\text{FeSO}_4$ ) at 80 °C for 24 h.<sup>6,7</sup> The oxidative stability for weight difference can be evaluated by the following formula (6).

$$\text{Oxidative stability } (\%) = \frac{W_{after}}{W_{before}} \times 100 \quad (S6)$$

### Proton conductivity

The proton conductivity of the membrane samples was determined using the alternating-current (AC) impedance method with a conductivity test Bench (Scitech, South Korea). The membrane samples were fixed in four probe Bekk-Tech cells, and the conductivity was measured as a function of temperature. During the measurement, the RH was fixed at 100, 30, or 15 %, and the temperature was varied from 30 to 120 °C, and kept constant for 120 min at each temperature to attain a steady-state.<sup>8,9</sup> The proton conductivity of the samples was calculated from the following equation (7).

$$\sigma \text{ (mS cm}^{-1}\text{)} = \frac{L}{RTW} \quad (S7)$$

where  $L$  (0.42 cm fixed),  $T$  (cm),  $W$  (cm), and  $R$  ( $\Omega$ ) are the sample's length, thickness, area, and ohmic resistance, respectively.

### **Membrane electrode assembly preparation and PEFC test**

The routine brush coating method was used to prepare membrane electrode assembly (MEA), as reported in the literature.<sup>2, 10, 11</sup> Catalyst coated carbon papers with a Pt loading of  $0.5 \text{ mg cm}^{-2}$  were used as the anode and cathode for the MEA. A membrane sample and two pieces of carbon papers were assembled as a sandwich to fabricate the MEA. The hot-compaction was conducted on a lamination jig (Model: HMM-04A) with a load of  $20 \text{ Kg cm}^{-2}$  at  $120 \text{ }^\circ\text{C}$  for 2 min. Next, the MEA was coupled with Teflon gaskets and fixed at the single cell equipped with a bipolar plate with a serpentine flow field machined on graphite plates (active area:  $5 \text{ cm}^2$ ). Then, the end plates of single cells were firmly assembled by fastening bolts with a torque of  $38 \text{ N m}$ . The PEFC test was performed at 80, 100, or  $125 \text{ }^\circ\text{C}$  under 100, 30, or 15% RH, respectively, without applying anode and cathode back-pressure using Scribner fuel cell test system (model: 850e Multi Range). The PEFC performance was measured for two specimens per membrane to confirm reproducibility. To evaluate the durability of membrane specimens, open-circuit voltage (OCV) decay was monitored as a function of time at  $100 \text{ }^\circ\text{C}$  under 30% RH. On the other side, the fluoride ion ( $\text{F}^-$ ) concentration in the outlet liquids from anode and cathode outlets was also quantified during the OCV decay test at  $100 \text{ }^\circ\text{C}$  under 30% RH using a fluoride-ion-selective electrode (Thermo Scientific, Orion 9009061). The outlet liquids were collected for each 20 h interval.

## Hydrogen permeability

The hydrogen permeability across the membranes has been evaluated in the PEFC (at 100 °C under 30% RH) configuration by linear sweep voltammetry (LSV) with a scan rate of 2 mV s<sup>-1</sup> in a sweep range of 0 to 0.6 V using a potentiostat (model: 885 Fuel Cell Potentiostat). During the measurement, the anode was kept under hydrogen purge (300 mL min<sup>-1</sup>) as the reference electrode, and the cathode was kept under nitrogen purge (300 mL min<sup>-1</sup>) as the working electrode. The crossover hydrogen from the anode to cathode oxidize at the cathode and deliver the current is represented as hydrogen crossover current. Hydrogen crossover flux (mol cm<sup>-2</sup> s<sup>-1</sup>) across membranes was calculated using Faraday's equation (8).

$$J_{flux} = \frac{i_{lim}}{(nF)} \quad (S8)$$

where  $i_{lim}$  is limiting current derived from LSV,  $n$  is number of electrons involved in reaction and  $F$  is Faraday constant.

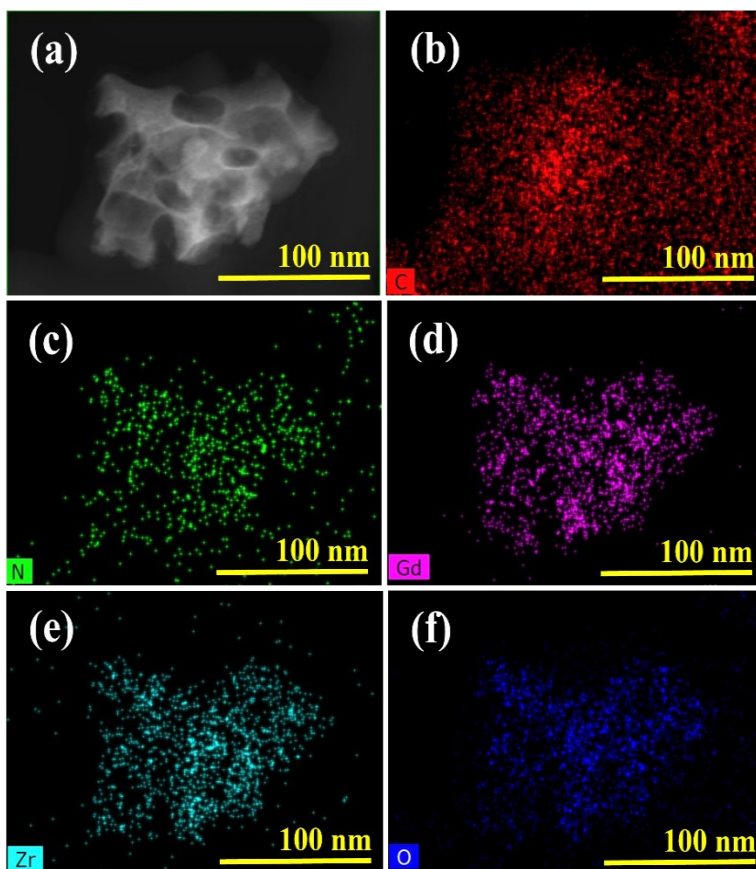

**Fig. S1.** FETEM elemental mappings of  $gC_3N_4-Gd_2Zr_2O_7$  correspond to (a) bright field image, (b) C-K, (c) N-K, (d) Gd-L, (e) Zr-L, and (f) O-K.

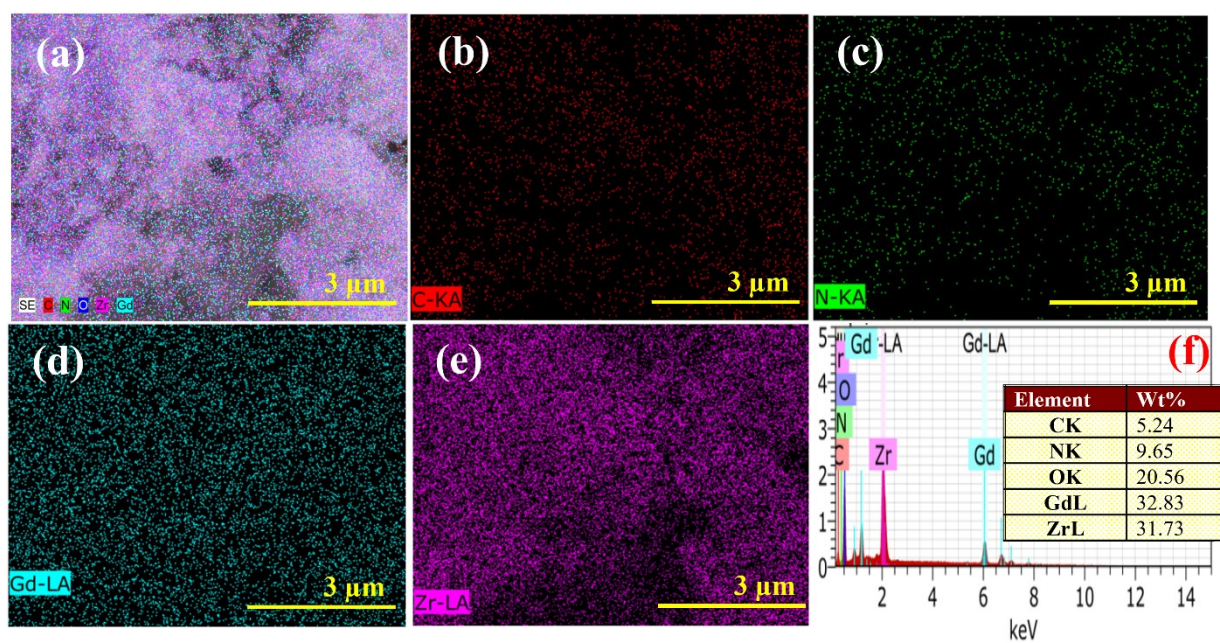

**Fig. S2.** SEM elemental mappings of  $gC_3N_4-Gd_2Zr_2O_7$  with respect to (a) overlapping of elements, (b) C-K, (c) N-K, (d) Gd-L, and (e) Zr-L; (f) EDS spectra of  $gC_3N_4-Gd_2Zr_2O_7$ .

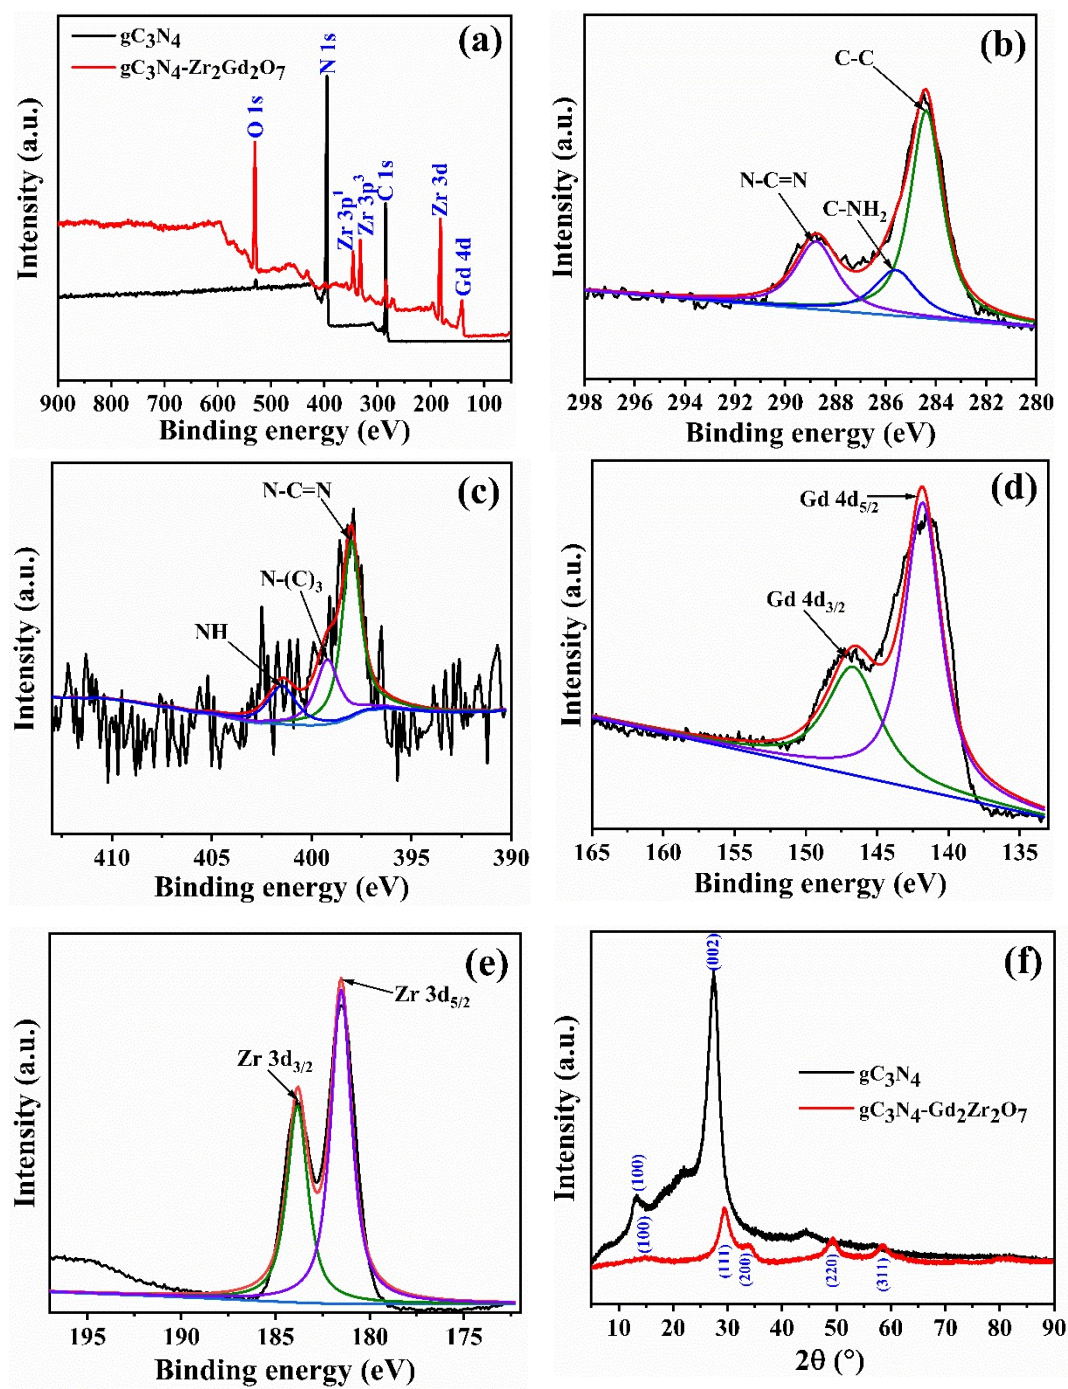

**Fig. S3.** XPS analysis of pristine  $gC_3N_4$  and  $gC_3N_4-Gd_2Zr_2O_7$ : (a) survey spectrum, (b) C 1s, (c) N 1s, (d) Gd 4d, and (e) Zr 3d; (f) XRD patterns of pristine  $gC_3N_4$  and  $gC_3N_4-Gd_2Zr_2O_7$ .



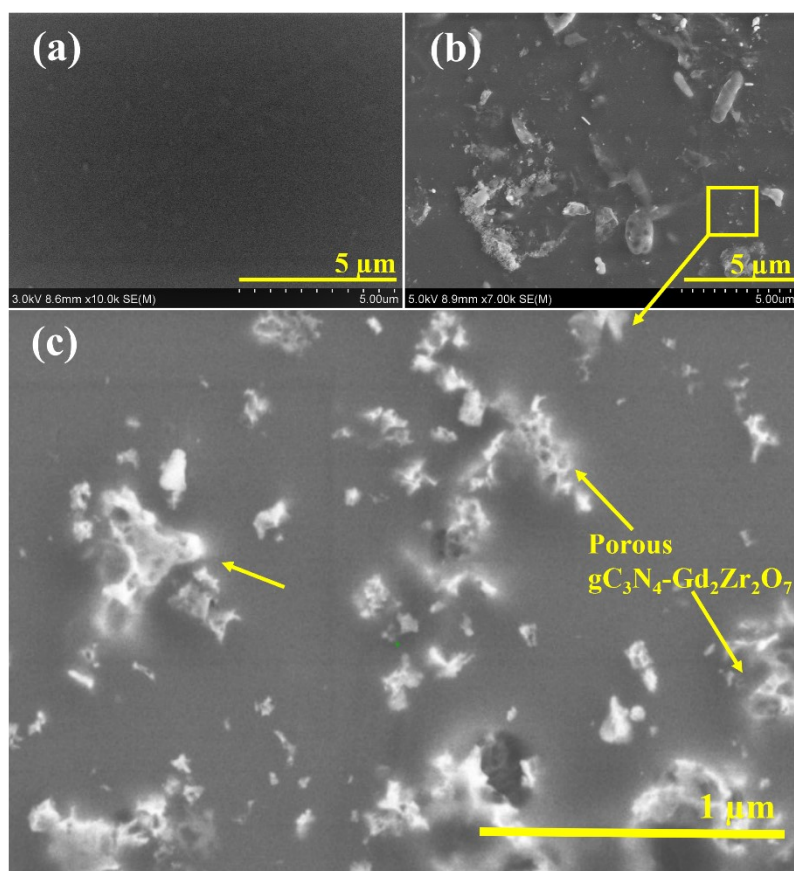

**Fig. S4.** SEM images correspond to the top-view morphology of (a) pristine Nafion and (b and c) Nafion/ $\text{gC}_3\text{N}_4\text{-Gd}_2\text{Zr}_2\text{O}_7$ .

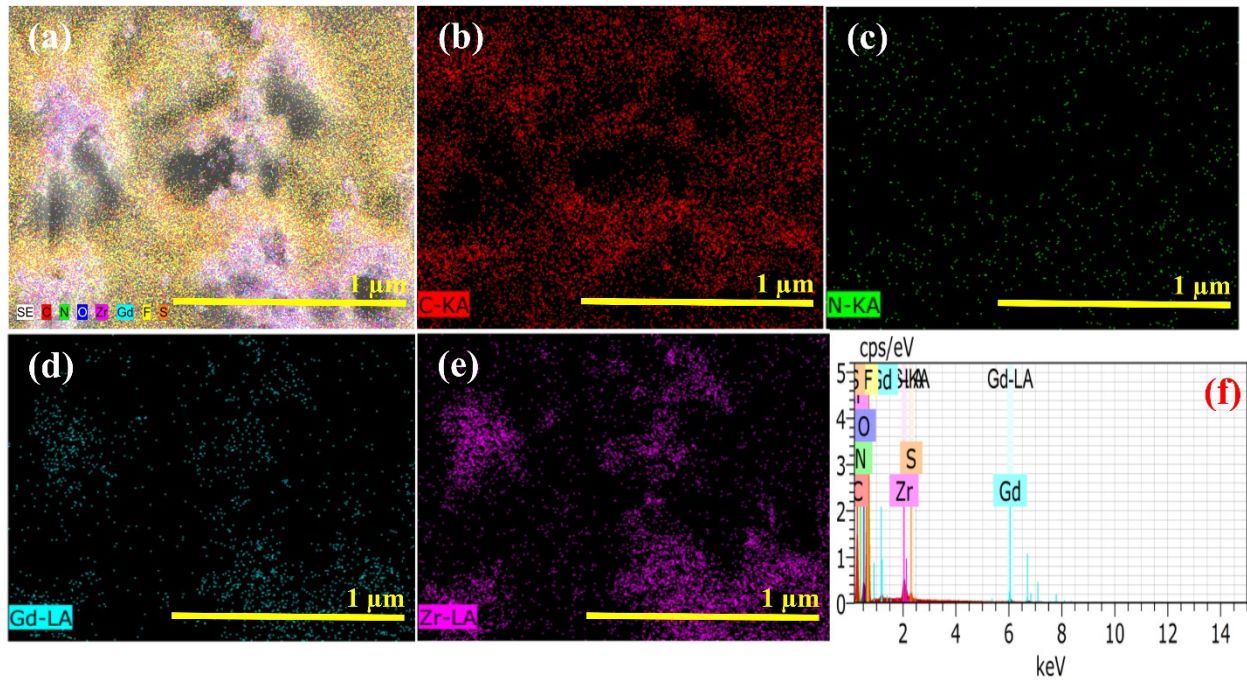

**Fig. S5.** SEM elemental mappings of Nafion/gC<sub>3</sub>N<sub>4</sub>-Gd<sub>2</sub>Zr<sub>2</sub>O<sub>7</sub> with respect to (a) overlapping of elements, (b) C-K, (c) N-K, (d) Gd-L, and (e) Zr-L; (f) EDS spectra of Nafion/gC<sub>3</sub>N<sub>4</sub>-Gd<sub>2</sub>Zr<sub>2</sub>O<sub>7</sub>.

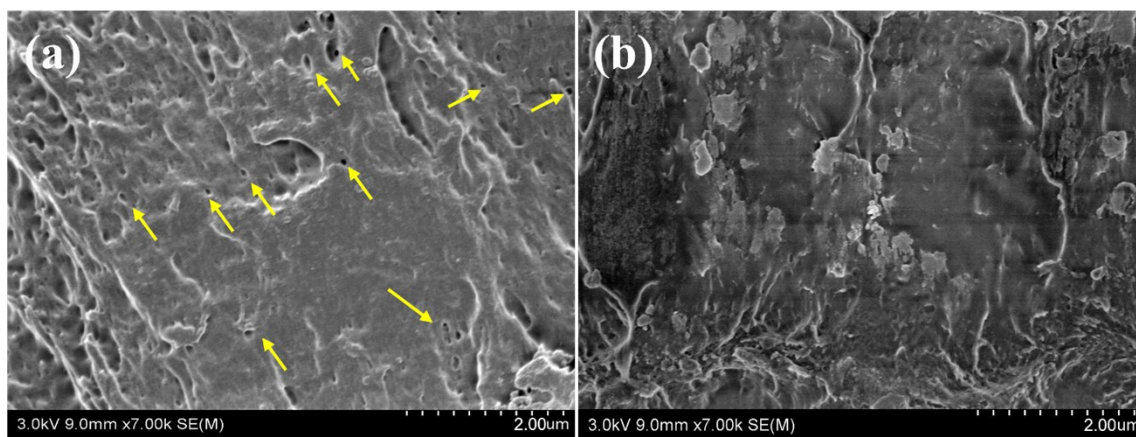

**Fig. S6.** SEM images correspond to the cross-sectional morphology of (a) pristine Nafion and (b) Nafion/gC<sub>3</sub>N<sub>4</sub>-Gd<sub>2</sub>Zr<sub>2</sub>O<sub>7</sub>.

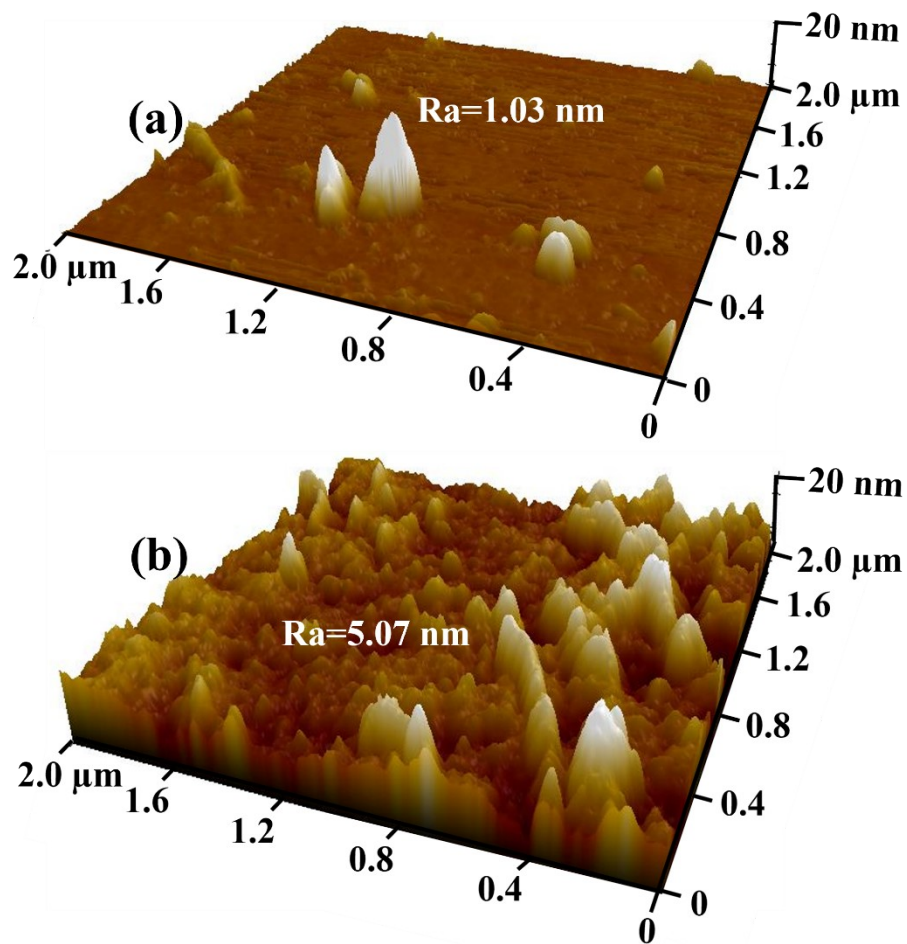

**Fig. S7.** AFM height images of (a) pristine Nafion and (b) Nafion/ $gC_3N_4$ - $Gd_2Zr_2O_7$ .

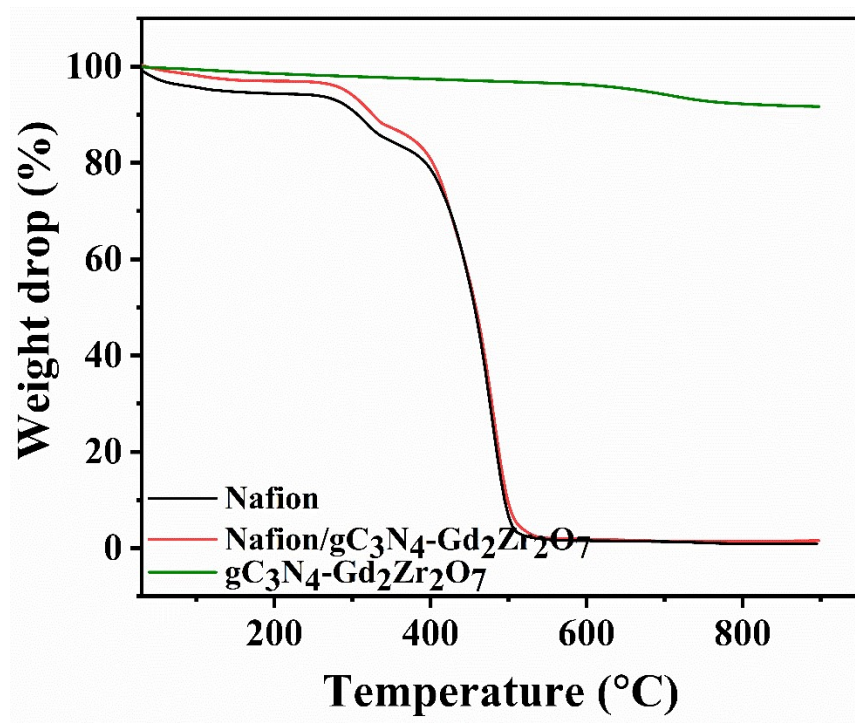

Fig. S8. TGA curves of pristine Nafion and Nafion/gC<sub>3</sub>N<sub>4</sub>-Gd<sub>2</sub>Zr<sub>2</sub>O<sub>7</sub>.

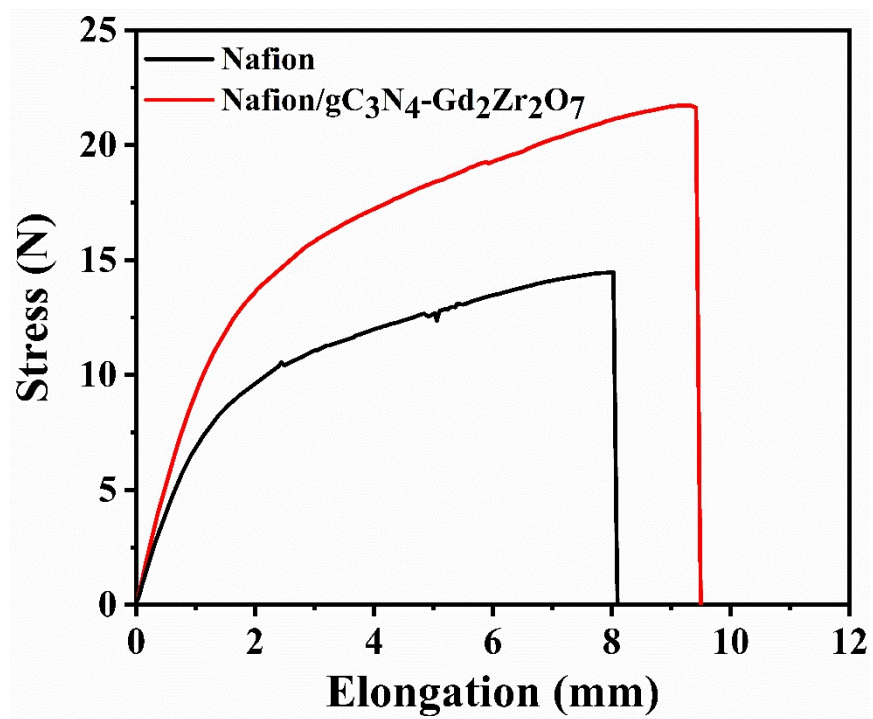

**Fig. S9.** UTM curves of pristine Nafion and Nafion/gC<sub>3</sub>N<sub>4</sub>-Gd<sub>2</sub>Zr<sub>2</sub>O<sub>7</sub>.

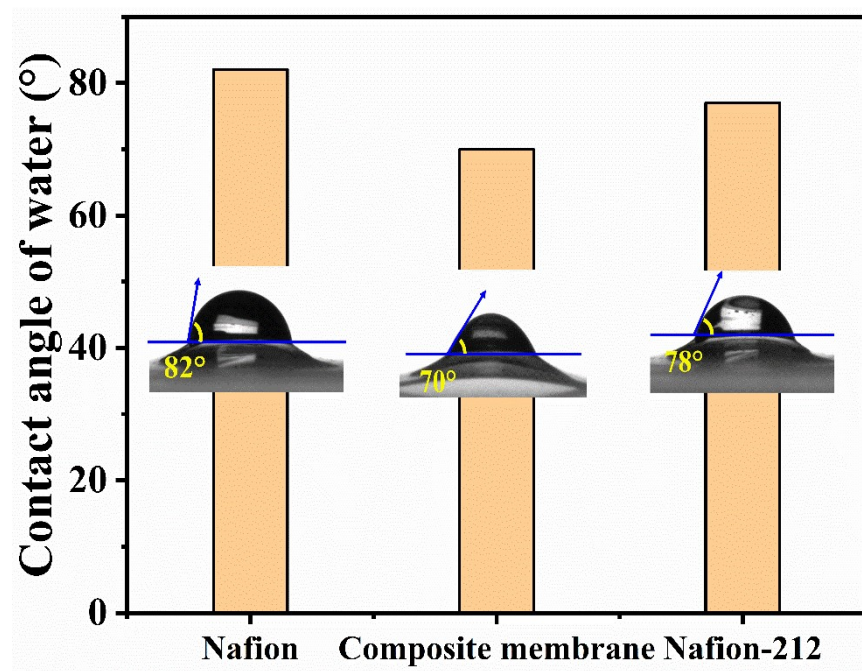

**Fig. S10.** Contact angle of water on prepared membranes quantified at room temperature.

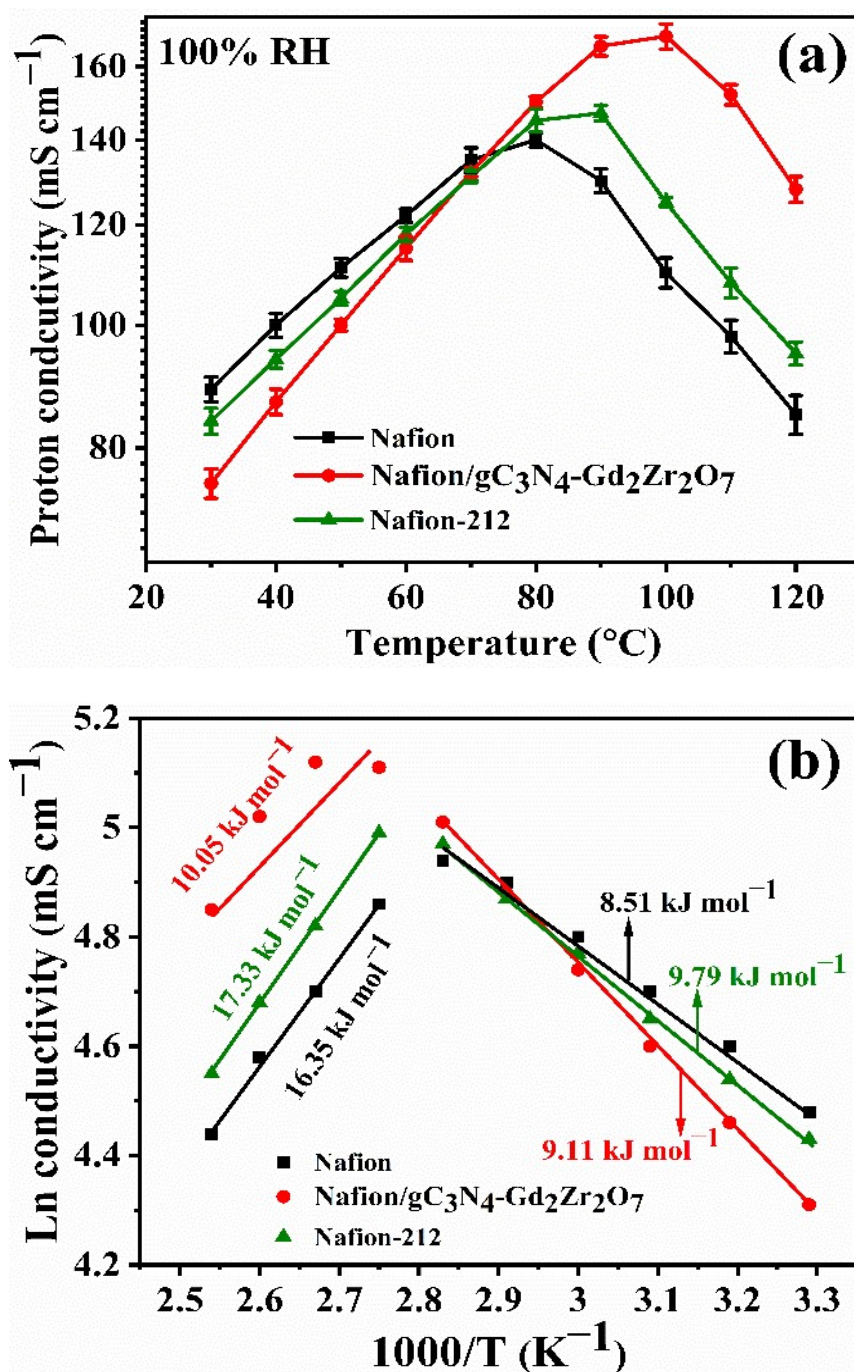

Fig. S11. (a) Proton conductivity plots of pristine Nafion, Nafion-212, and composite membranes as a function of temperature at 100% RH and (b) corresponding Arrhenius plots derived from proton conductivities.



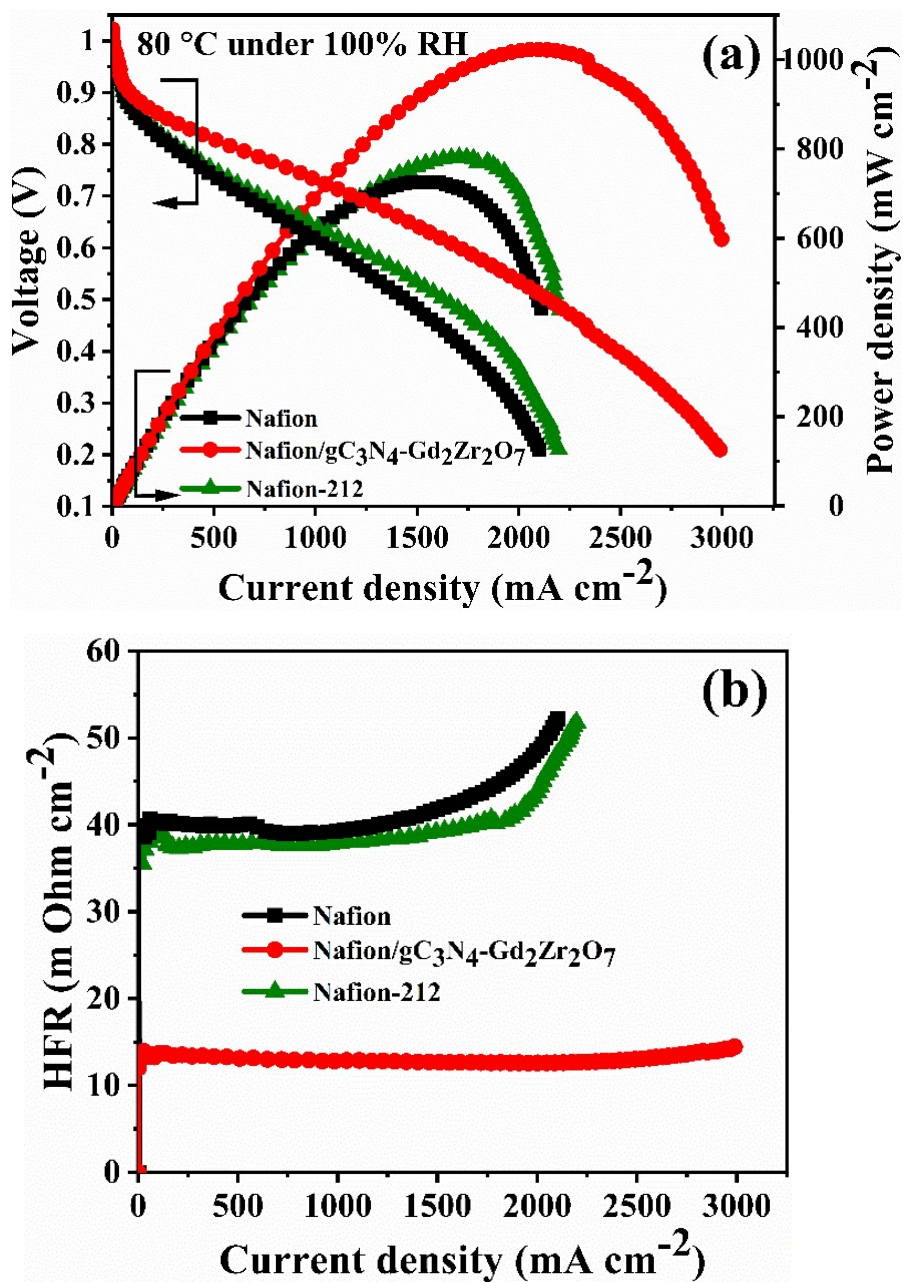

**Fig. S12.** (a) PEFC polarization curves and (b) high-frequency resistance (HFR) curves of pristine Nafion, Nafion-212, and composite membranes quantified at 80 °C under 100% RH.

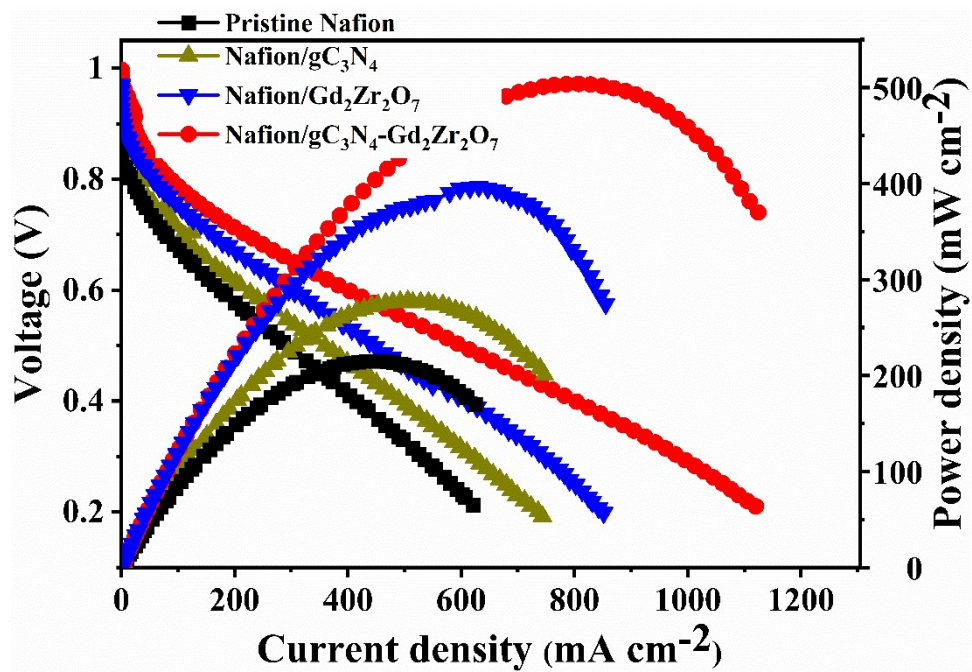

**Fig. S13.** PEFC polarization curves of pristine Nafion, Nafion/ $\text{gC}_3\text{N}_4$ , Nafion/ $\text{Gd}_2\text{Zr}_2\text{O}_7$ , and Nafion/ $\text{gC}_3\text{N}_4$ - $\text{Gd}_2\text{Zr}_2\text{O}_7$  membranes quantified at 100 °C under 30% RH.

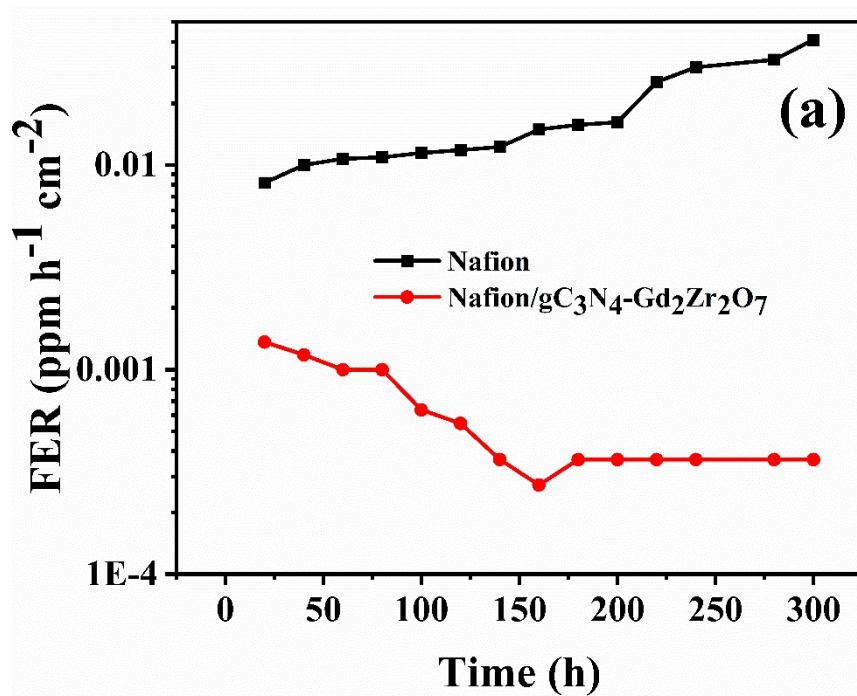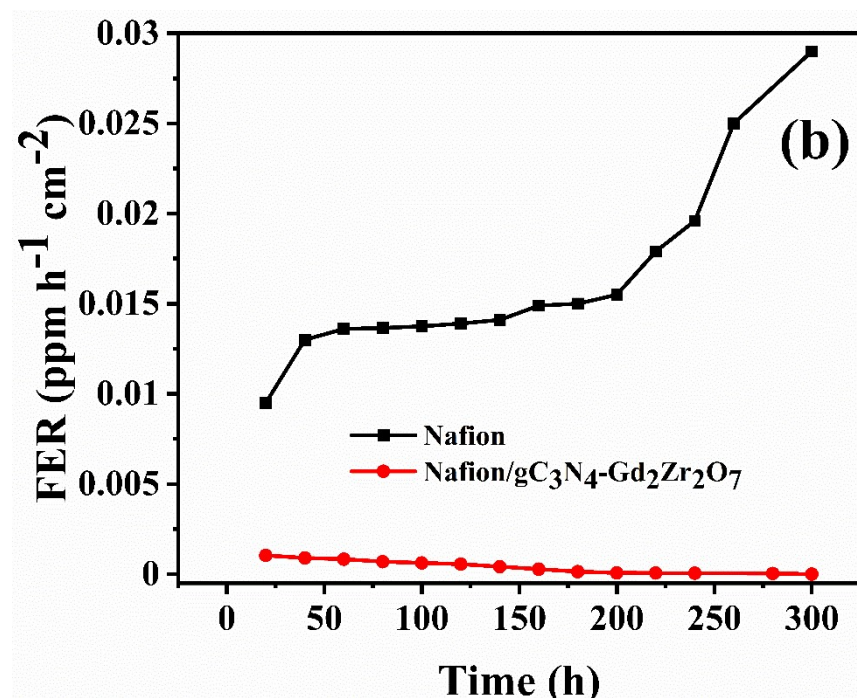

**Fig. S14.** Fluoride emission rate (FER) values measured during OCV holding test of pristine Nafion and Nafion/gC<sub>3</sub>N<sub>4</sub>-Gd<sub>2</sub>Zr<sub>2</sub>O<sub>7</sub> composite membranes at 100 °C under 30% RH at (a) anode and (b) cathode outlets.

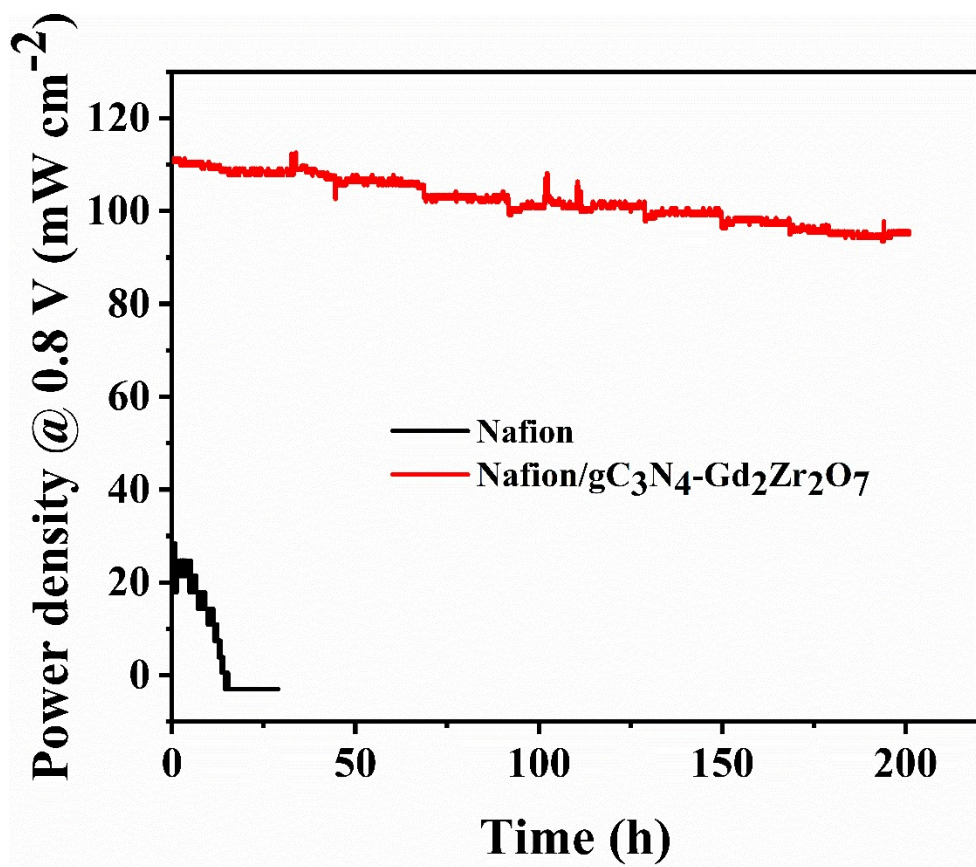

**Fig. S15.** Time-dependent power density of pristine Nafion and its composite membrane quantified at 100 °C under 30% RH by applying 0.8 V load.

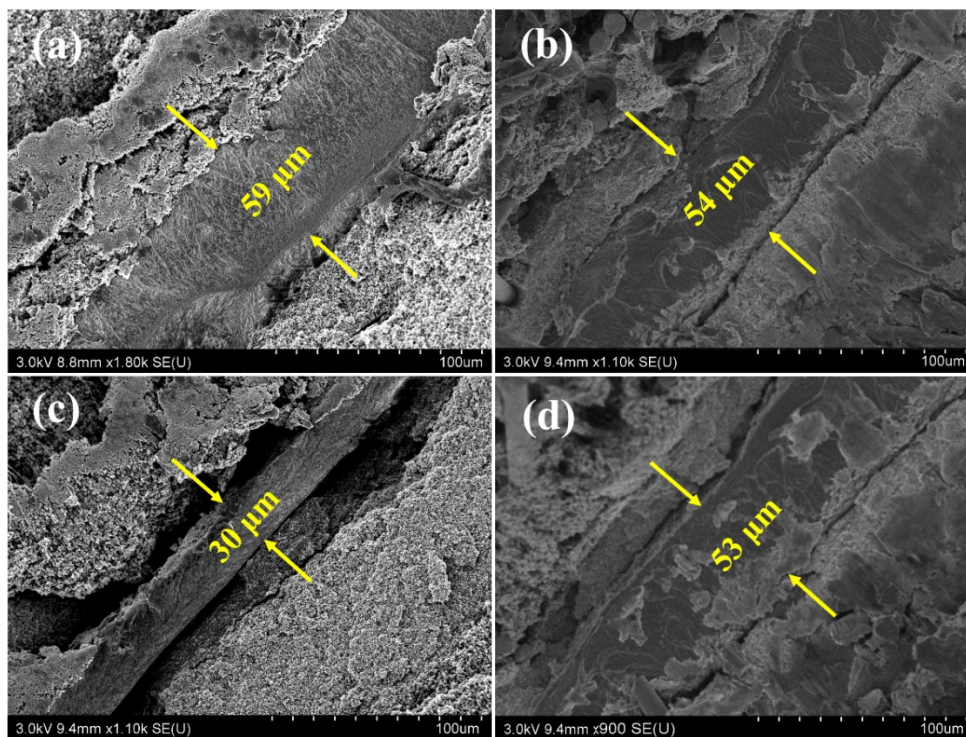

**Fig. S16.** SEM images of MEAs before and after OCV durability test at 100°C under 30% RH:

(a and c) pristine Nafion and (b and d) Nafion/gC<sub>3</sub>N<sub>4</sub>-Gd<sub>2</sub>Zr<sub>2</sub>O<sub>7</sub>.

**Table S1.** Water uptake, dimensional change, thickness change, ion exchange capacity (IEC), hydration number, and oxidative stability of Nafion-212, pristine Nafion, and composite membranes.

| S. No | Membrane types                                                                                  | Water uptake (%) | Dimensional change (%) | Thickness change (%) | IEC (meq. g <sup>-1</sup> ) | Hydration number ( $\lambda$ ) | Oxidative stability (%) |
|-------|-------------------------------------------------------------------------------------------------|------------------|------------------------|----------------------|-----------------------------|--------------------------------|-------------------------|
| 1     | Pristine Nafion                                                                                 | 24.1             | 18.3                   | 12.4                 | 0.96                        | 13.8                           | 95.4                    |
| 2     | Nafion/gC <sub>3</sub> N <sub>4</sub> -Gd <sub>2</sub> Zr <sub>2</sub> O <sub>7</sub> (0.5 wt%) | 27.6             | 16.2                   | 17.3                 | 0.94                        | 16.2                           | 96.8                    |
| 3     | Nafion/gC <sub>3</sub> N <sub>4</sub> -Gd <sub>2</sub> Zr <sub>2</sub> O <sub>7</sub> (1 wt%)   | 33.2             | 11.4                   | 21.1                 | 0.91                        | 20.2                           | 99.7                    |
| 4     | Nafion/gC <sub>3</sub> N <sub>4</sub> -Gd <sub>2</sub> Zr <sub>2</sub> O <sub>7</sub> (1.5 wt%) | 35.6             | 10.1                   | 22.6                 | 0.90                        | 21.3                           | 100                     |
| 5     | Nafion-212                                                                                      | 26.3             | 19.2                   | 13.2                 | 0.97                        | 15.0                           | 98.2                    |

**Table S2.** Proton conductivity of Nafion -212, pristine Nafion and composite membranes with different wt%  $\text{gC}_3\text{N}_4\text{-Gd}_2\text{Zr}_2\text{O}_7$ .

| S. No | Membrane types                                                             | Proton conductivity at 80 °C under 100% RH (mS cm <sup>-1</sup> ) | Proton conductivity at 100 °C under 30% RH (mS cm <sup>-1</sup> ) | Proton conductivity at 120 °C under 15% RH (mS cm <sup>-1</sup> ) |
|-------|----------------------------------------------------------------------------|-------------------------------------------------------------------|-------------------------------------------------------------------|-------------------------------------------------------------------|
| 1     | Pristine Nafion                                                            | 140.7                                                             | 11.0                                                              | 2.3                                                               |
| 2     | Nafion/ $\text{gC}_3\text{N}_4\text{-Gd}_2\text{Zr}_2\text{O}_7$ (0.5 wt%) | 144.4                                                             | 68.3                                                              | 24.4                                                              |
| 3     | Nafion/ $\text{gC}_3\text{N}_4\text{-Gd}_2\text{Zr}_2\text{O}_7$ (1 wt%)   | 150.2                                                             | 84.1                                                              | 37.2                                                              |
| 4     | Nafion/ $\text{gC}_3\text{N}_4\text{-Gd}_2\text{Zr}_2\text{O}_7$ (1.5 wt%) | 146.2                                                             | 78.2                                                              | 27.6                                                              |
| 5     | Nafion-212                                                                 | 145.1                                                             | 19.3                                                              | 3.3                                                               |

**Table S3.** Comparison of proton conductivities of various Nafion-based membranes over 100 °C from recent literatures.

| S. No | Membrane materials                                                                        | Proton conductivity<br>(mS cm <sup>-1</sup> ) | Operating conditions |                       | Ref.               |
|-------|-------------------------------------------------------------------------------------------|-----------------------------------------------|----------------------|-----------------------|--------------------|
|       |                                                                                           |                                               | Temperature (°C)     | Relative humidity (%) |                    |
| 1     | Nafion/s-WR                                                                               | ~17                                           | 110                  | 20                    | 2019 <sup>12</sup> |
| 2     | Nafion/silica                                                                             | ~13                                           | 110                  | 20                    | 2020 <sup>13</sup> |
| 3     | Nafion/SO <sub>3</sub> H-UGNF                                                             | 127                                           | 120                  | 50                    | 2021 <sup>3</sup>  |
| 4     | Nafion/SO <sub>3</sub> H-UGNF                                                             | 10.1                                          | 120                  | 18                    | 2021 <sup>3</sup>  |
| 5     | Nafion/PTFE                                                                               | ~15                                           | 100                  | NA                    | 2021 <sup>14</sup> |
| 6     | Nafion/PTFE                                                                               | ~3                                            | 120                  | NA                    | 2021 <sup>14</sup> |
| 7     | Nafion/PTFE                                                                               | ~158                                          | 110                  | 100                   | 2021 <sup>15</sup> |
| 8     | Nafion/PWA/Si                                                                             | 15                                            | 110                  | 20                    | 2021 <sup>16</sup> |
| 9     | Nafion/gC <sub>3</sub> N <sub>4</sub> -<br>Gd <sub>2</sub> Zr <sub>2</sub> O <sub>7</sub> | 84                                            | 100                  | 30                    | This work          |
| 10    | Nafion/gC <sub>3</sub> N <sub>4</sub> -<br>Gd <sub>2</sub> Zr <sub>2</sub> O <sub>7</sub> | 37                                            | 125                  | 15                    | This work          |



**Table S4.** Comparison of HFR of various Nafion-based membranes with present work.

| <b>S. No</b> | <b>Membrane types</b>                                                                 | <b>HFR (m Ohm cm<sup>-2</sup>)</b> | <b>Operating conditions:<br/>Temperature (°C) /RH<br/>(%)</b> | <b>References</b> |
|--------------|---------------------------------------------------------------------------------------|------------------------------------|---------------------------------------------------------------|-------------------|
| 1            | Nafion-SSA                                                                            | ~790                               | 80/25                                                         | 10                |
| 2            | Nafion-TNT                                                                            | 380                                | 80/18                                                         | 11                |
| 3            | SnP <sub>2</sub> O <sub>7</sub> /Nafion                                               | 110                                | 200/NA                                                        | 17                |
| 4            | GO-Nafion                                                                             | ~123                               | 100/NA                                                        | 18                |
| 5            | Nafion/gC <sub>3</sub> N <sub>4</sub> -Gd <sub>2</sub> Zr <sub>2</sub> O <sub>7</sub> | 113                                | 100/30                                                        | This work         |
| 6            | Nafion-212                                                                            | 424                                | 100/30                                                        | This work         |
| 7            | Nafion/gC <sub>3</sub> N <sub>4</sub> -Gd <sub>2</sub> Zr <sub>2</sub> O <sub>7</sub> | 188                                | 125/15                                                        | This work         |
| 8            | Nafion-212                                                                            | 847                                | 125/15                                                        | This work         |

## References

1. M. Vinothkannan, R. Hariprasad, S. Ramakrishnan, A. R. Kim and D. J. Yoo, *ACS Sustainable Chemistry & Engineering*, 2019, **7**, 12847-12857.
2. D. Han, S. I. Hossain, B. Son, D. H. Lee and S. Shanmugam, *ACS Sustainable Chemistry & Engineering*, 2019, **7**, 16889-16899.
3. M. Vinothkannan, A. R. Kim, S. Ramakrishnan, Y.-T. Yu and D. J. Yoo, *Composites Part B: Engineering*, 2021, **215**, 108828.
4. S. Gahlot and V. Kulshrestha, *ACS Applied Materials & Interfaces*, 2015, **7**, 264-272.
5. S. Gahlot, P. P. Sharma, V. Kulshrestha and P. K. Jha, *ACS Applied Materials & Interfaces*, 2014, **6**, 5595-5601.
6. A. R. Kim, C. J. Park, M. Vinothkannan and D. J. Yoo, *Composites Part B: Engineering*, 2018, **155**, 272-281.
7. A. R. Kim, M. Vinothkannan and D. J. Yoo, *Journal of Energy Chemistry*, 2018, **27**, 1247-1260.
8. H. Zarrin, D. Higgins, Y. Jun, Z. Chen and M. Fowler, *The Journal of Physical Chemistry C*, 2011, **115**, 20774-20781.
9. C. Xu, Y. Cao, R. Kumar, X. Wu, X. Wang and K. Scott, *Journal of Materials Chemistry*, 2011, **21**, 11359-11364.
10. K. Oh, O. Kwon, B. Son, D. H. Lee and S. Shanmugam, *Journal of Membrane Science*, 2019, **583**, 103-109.
11. K. Ketpang, K. Lee and S. Shanmugam, *ACS Applied Materials & Interfaces*, 2014, **6**, 16734-16744.
12. G. Xu, Z. Wei, S. Li, J. Li, Z. Yang and S. A. Grigoriev, *International Journal of Hydrogen Energy*, 2019, **44**, 29711-29716.
13. G. Xu, Z. Wu, Z. Wei, W. Zhang, J. Wu, Y. Li, J. Li, K. Qu and W. Cai, *Renewable Energy*, 2020, **153**, 935-939.
14. X. Zhang, D. Trieu, D. Zheng, W. Ji, H. Qu, T. Ding, D. Qiu and D. Qu, *Industrial & Engineering Chemistry Research*, 2021, **60**, 11086-11094.
15. S. Ryu, B. Lee, J.-H. Kim, C. Pak and S.-H. Moon, *International Journal of Energy Research*, 2021, **45**, 19136-19146.
16. G. Xu, S. Xue, Z. Wei, J. Li, K. Qu, Y. Li and W. Cai, *International Journal of Hydrogen Energy*, 2021, **46**, 4301-4308.
17. K. P. Ramaiyan, S. Herrera, M. J. Workman, T. A. Semelsberger, V. Atanasov, J. Kerres, S. Maurya, Y. S. Kim, C. R. Kreller and R. Mukundan, *Journal of Materials Chemistry A*, 2020, **8**, 16345-16354.
18. A. Ibrahim, O. Hossain, J. Chaggar, R. Steinberger-Wilckens and A. El-Kharouf, *International Journal of Hydrogen Energy*, 2020, **45**, 5526-5534.
